# Supplementary material for: Encapsulation of Oregano (Origanum onites L.) Essential Oil in β-Cyclodextrin (β-CD): Synthesis and Characterization of the Inclusion Complexes
Source: PubMed Central journal article supplement (PMC5615320; doi:10.3390/bioengineering4030074), 2017-09-09
Supplement: bioengineering-04-00074-s001.pdf [file bioengineering-04-00074-s001.pdf]

# Supplementary Materials: Encapsulation of Oregano (*Origanum onites L.*) Essential Oil in $\beta$ -Cyclodextrin ( $\beta$ -CD): Synthesis and Characterization of the Inclusion Complexes

Margarita Kotronia, Eleni Kavetsou, Sofia Loupassaki, Stefanos Kikionis, Stamatina Vouyiouka and Anastasia Detsi

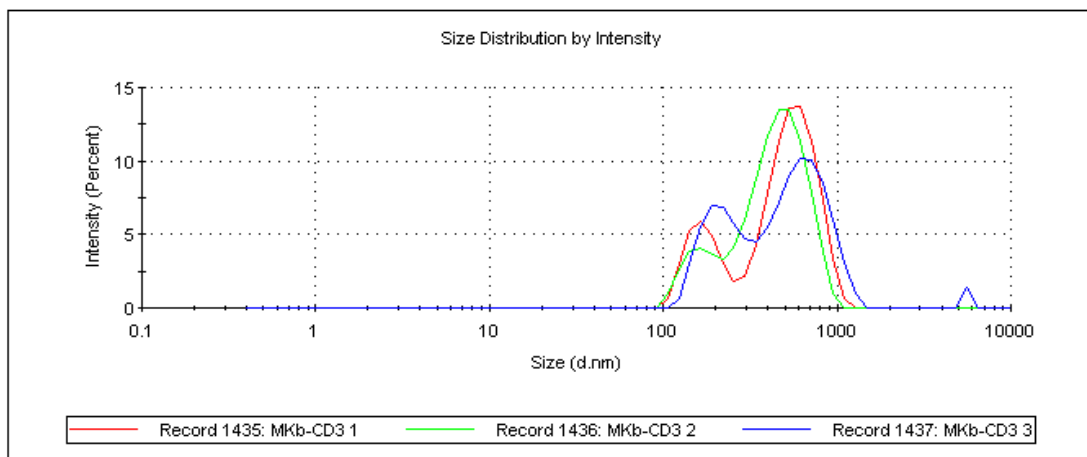

Figure S1: The size distribution of the  $\beta$ -CD – oregano EO ICs (2).

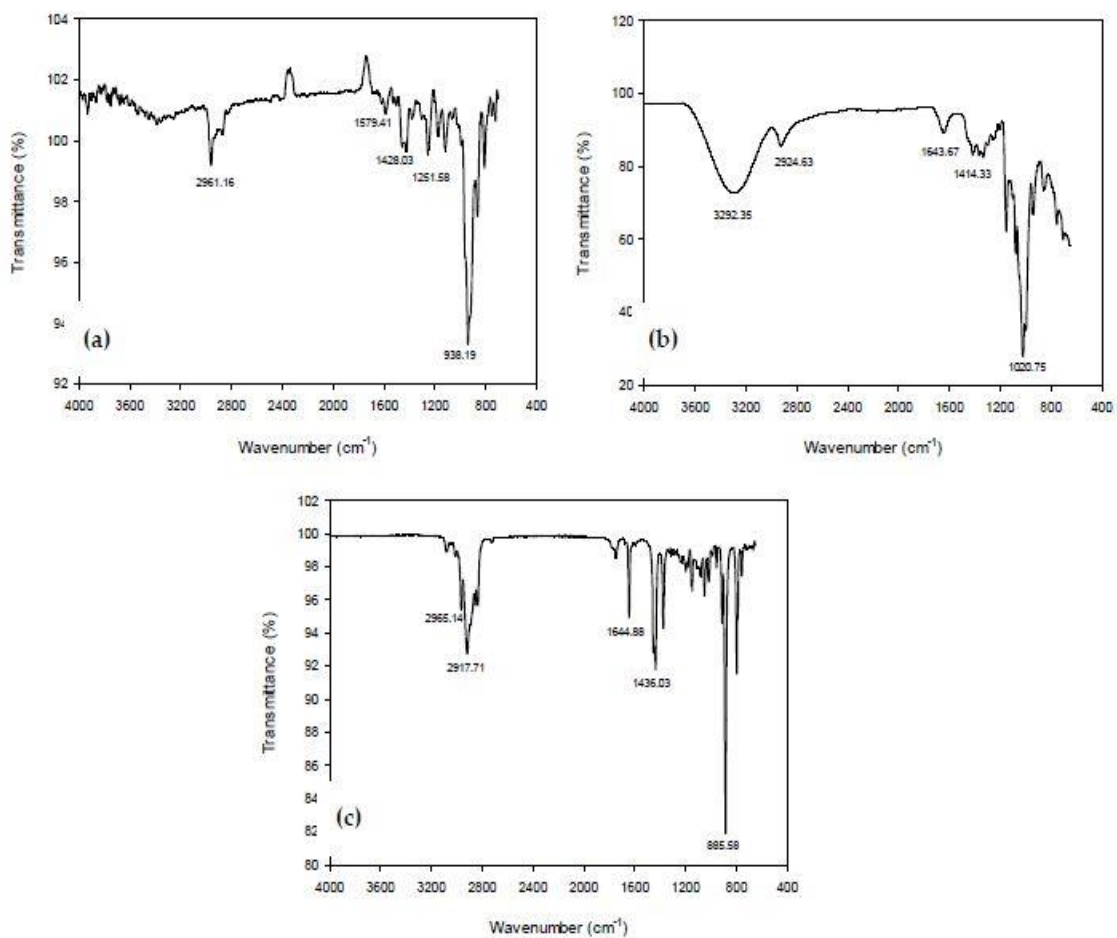

**Figure S2:** The IR spectra of the oregano EO (a),  $\beta$ -CD (b) and  $\beta$ -CD - oregano EO ICs (c).

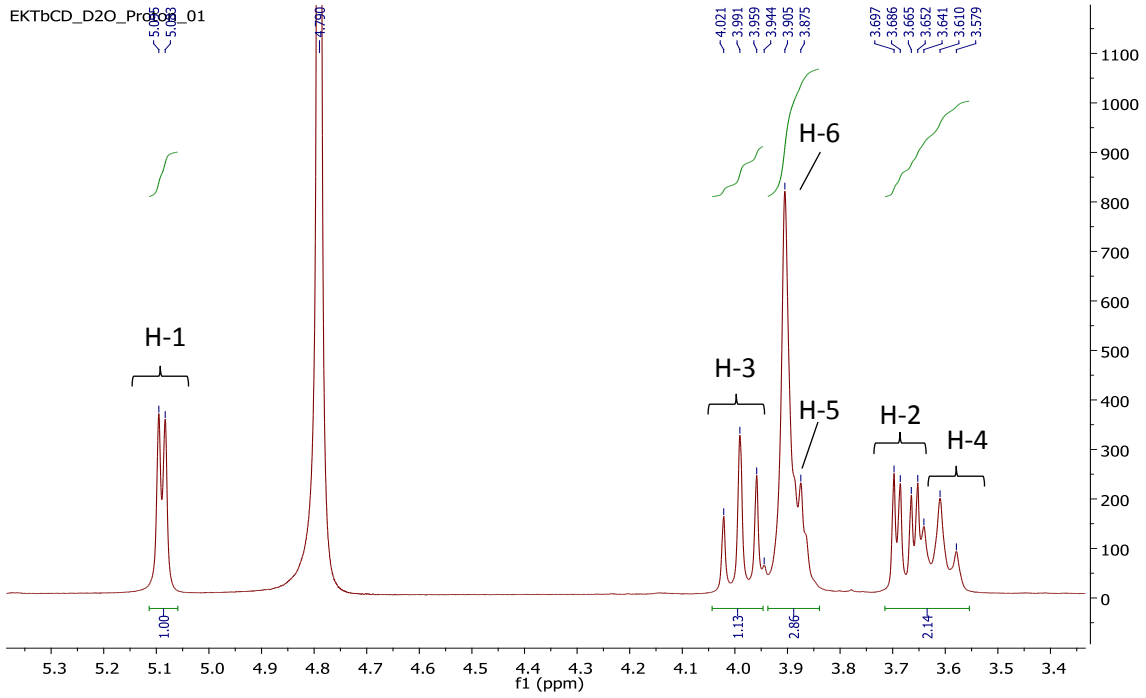

(a)

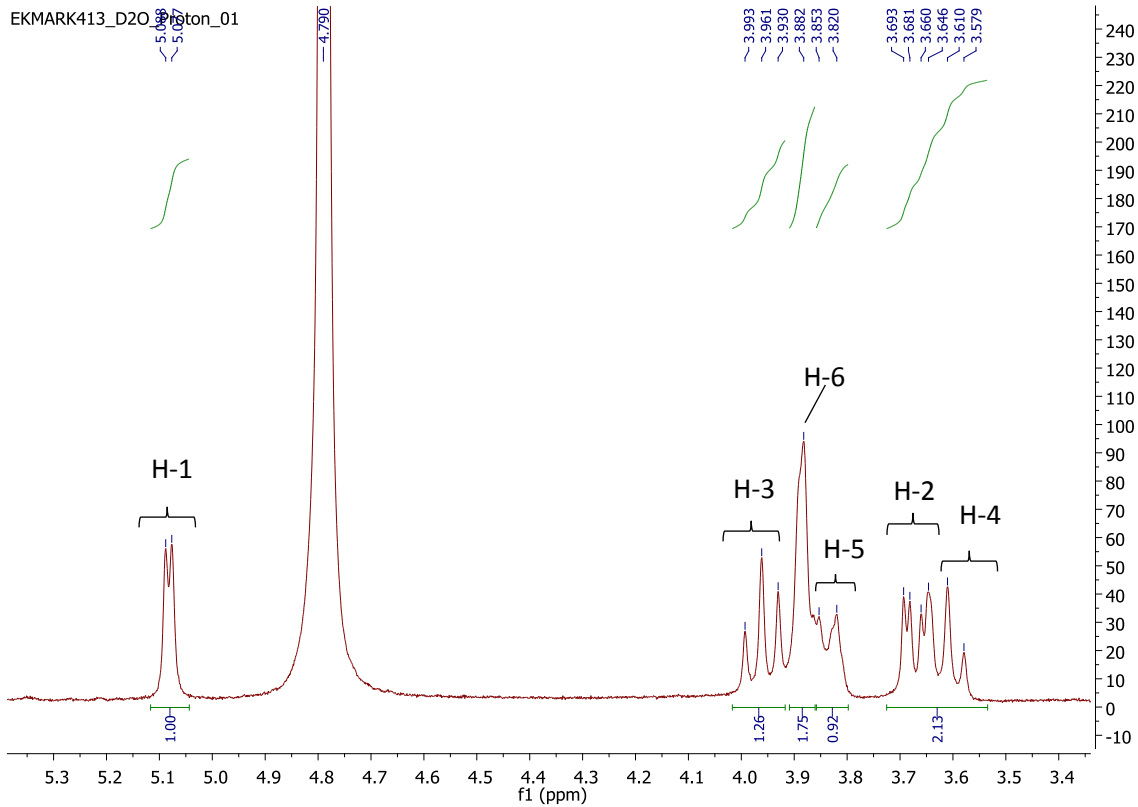

(b)

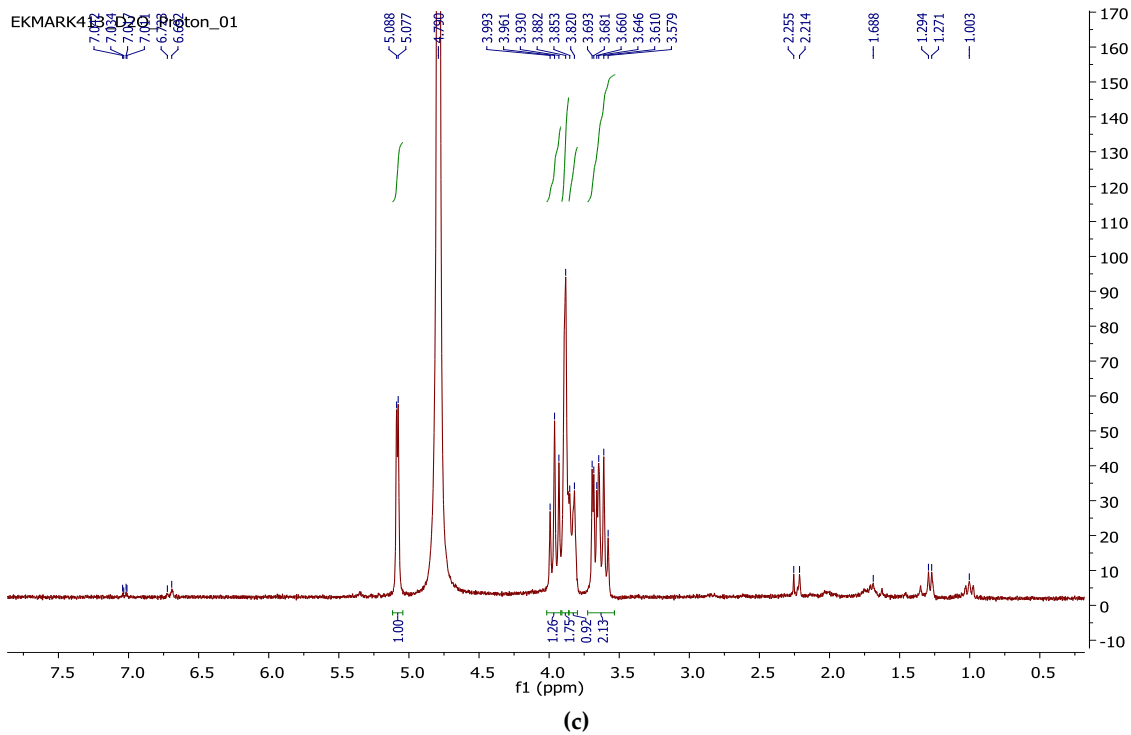

**Figure S3:** The  $^1\text{H}$  NMR spectra (300 MHz,  $\text{D}_2\text{O}$ ) of  $\beta$ -CD (a),  $\beta$ -CD – oregano EO ICs (expanded region 3 - 5.5 ppm) (b) and  $\beta$ -CD – oregano EO ICs (c).
